# Supplementary material for: Understanding improved capacity retention at 4.3 V in modified single crystal Ni-rich NMC//graphite pouch cells at elevated temperature
Source: Royal Society of Chemistry journal article supplement (doi:10.1039/d3lf00093a), 2023-09-21
Supplement: d3lf00093a1.pdf [file d3lf00093a1.pdf]

## Supporting Information: Understanding improved capacity retention at 4.3 V in modified single crystal Ni-rich NMC//graphite pouch cells

Galo J. Páez Fajardo<sup>a,g</sup>, Meltiani Belekoukia<sup>a,g</sup>, Satish Bolloju<sup>a</sup>, Eleni Fiamegkou<sup>a</sup>, Ashok S. Menon<sup>a,g</sup>, Zachary Ruff<sup>b,g</sup>, Zonghao Shen<sup>c,g</sup>, Nickil Shah<sup>a</sup>, Erik Björklund<sup>d,g</sup>, Mateusz Jan Zuba<sup>e</sup>, Tien-Lin Lee<sup>f</sup>, Pardeep K. Thakur<sup>f</sup>, Robert S. Weatherup<sup>d,g</sup>, Ainara Aguadero<sup>c,g</sup>, Melanie J. Loveridge<sup>a</sup>, Clare P. Grey<sup>b,g</sup>, Louis F. J. Piper<sup>a,g,\*</sup>

<sup>a</sup>WMG, University of Warwick, Coventry, CV4 7AL, United Kingdom

<sup>b</sup>Department of Chemistry, University of Cambridge, Cambridge CB2 1EW, United Kingdom

<sup>c</sup>Department of Materials, Imperial College London, Royal School of Mines, London SW7 2AZ, United Kingdom

<sup>d</sup>Department of Materials, University of Oxford, Oxford, England OX1 3PH, United Kingdom

<sup>e</sup>Materials Engineering Research Facility, Energy Sciences Division, Argonne National Laboratory, Lemont, Illinois 60439, USA

<sup>f</sup>Diamond Light Source Ltd., Harwell Science and Innovation Campus, Didcot, Oxfordshire, OX1 3QR, United Kingdom

<sup>g</sup>The Faraday Institution, Quad One, Harwell Science and Innovation Campus, Didcot, UK

### 1. ToF-SIMS point-to-point data of pristine SC Al-surface-doped-Ni-rich NMC

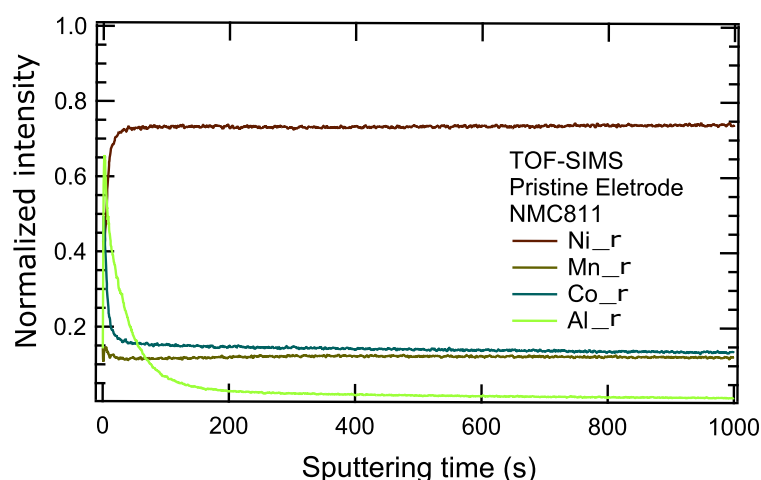

Figure S1: Rescaling normalization of the Point-to-point intensities for qualitative comparison.

The Ni<sub>r</sub>, Mn<sub>r</sub>, Co<sub>r</sub>, and Al<sub>r</sub> relative values in Figure S2 are obtained following  $(XO^- + XO_2^-)/(NiO^- + NiO_2^- + MnO^- + MnO_2^- + CoO^- + CoO_2^-)$ , where X is Ni, Mn, Co, and Al. It only presents the relative behaviour of each element from surface to bulk. Intensities show an opposite behavior at long sputtering time signifying deeper SC NMC-811 particle depth. At small sputtering times, Al signal is greater in intensity and decays in deeper particle depth in a depth profiling experiment. The trends for the transition metals oppose the Al's trend with higher intensities at deeper depth into the SC NMC-811 particle. Moreover, the relative values for the transition metal at long sputtering time shows a steady composition in the bulk of SC NMC-811. To be noted the intensities are not only proportional to the concentrations but significantly affected by the known matrix effects. Lack of the relative sensitive factor (RSF) for each specie makes it very difficult to perform a quantitative analysis in SIMS. The values do not reflect the real bulk composition values here, and the bulk composition is determined by ICP.

\*Corresponding author

Email address: louis.piper@warwick.ac.uk (Louis F. J. Piper)

## 2. XAS TM experiments on graphite to confirm TM oxidation states

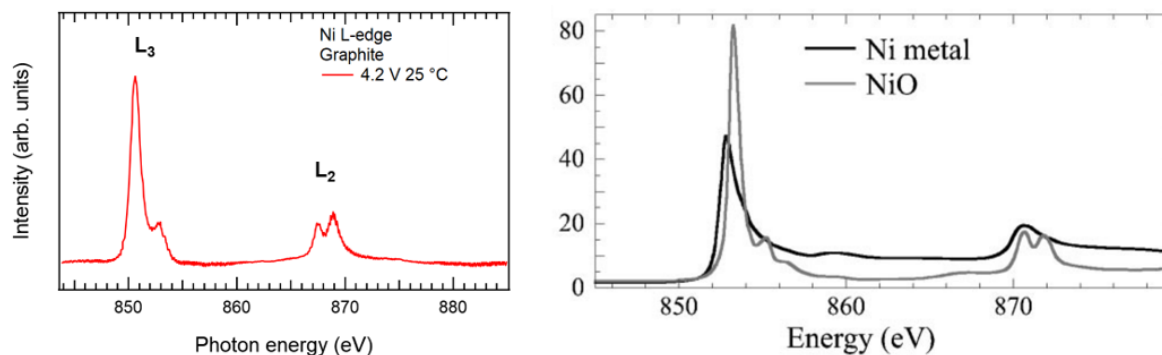

Figure S2: L-edge XAS experiments on graphite after 500 cycles and comparison with literature

The left figure is our Ni L-edge measurements on graphite after 500 cycles at 4.2 V 25 °C. The right figure is literature reference from [Phys. Rev. B (2001) 64, 21442, <https://doi.org/10.1103/PhysRevB.64.214422>]. A metallic environment shows a single broad  $L_3$  and  $L_2$  peak while Ni ions with ligands show splitting on these peaks indicating that oxidation states other than the metallic is expected for the ions deposited on the graphite anode.
